# Supplementary material for: Bulk crystal seeding in the generation of mesopores by organosilane surfactants in zeolite synthesis
Source: Royal Society of Chemistry journal article supplement (doi:10.1039/c4ta01948b), 2014-01-01

## Bulk crystal seeding on the generation of mesopores by organosilane surfactants in zeolite synthesis

Jaeheon Kim,<sup>a,b</sup> Changbum Jo,<sup>\*,a</sup> Seungjun Lee,<sup>a,b</sup> and Ryong Ryoo<sup>\*,a,b</sup>

<sup>a</sup> Center for Nanomaterials and Chemical Reactions, Institute for Basic Science (IBS),  
Daejeon 305-701, Republic of Korea.

<sup>b</sup> Department of Chemistry, KAIST, Daejeon 305-701, Republic of Korea.

\*E-mail: ryongryoo@kaist.ac.kr, and jochangbum@kaist.ac.kr

\*Tel: +82-42-350-2870

**Fig. S1** SEM and TEM images of s-MOR.

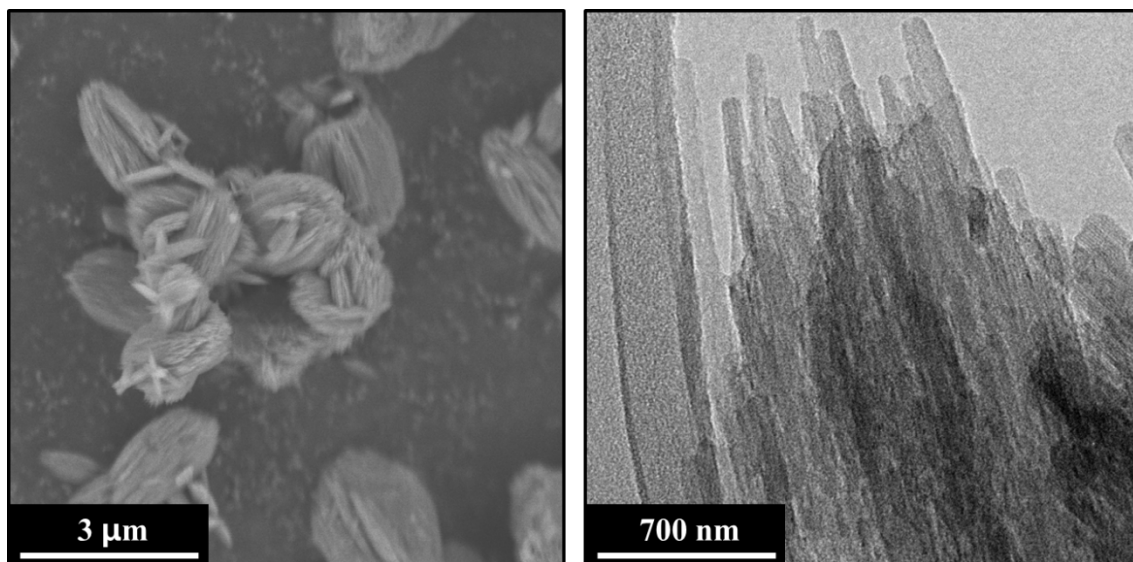

**Fig. S2** (a and b) High resolution TEM images and (inset of a and b) their corresponding fast Fourier transform (FFT) images of *s*-MOR which indicated the *c*-axis of MOR structure was parallel to the longest edge of MOR-nanorods.

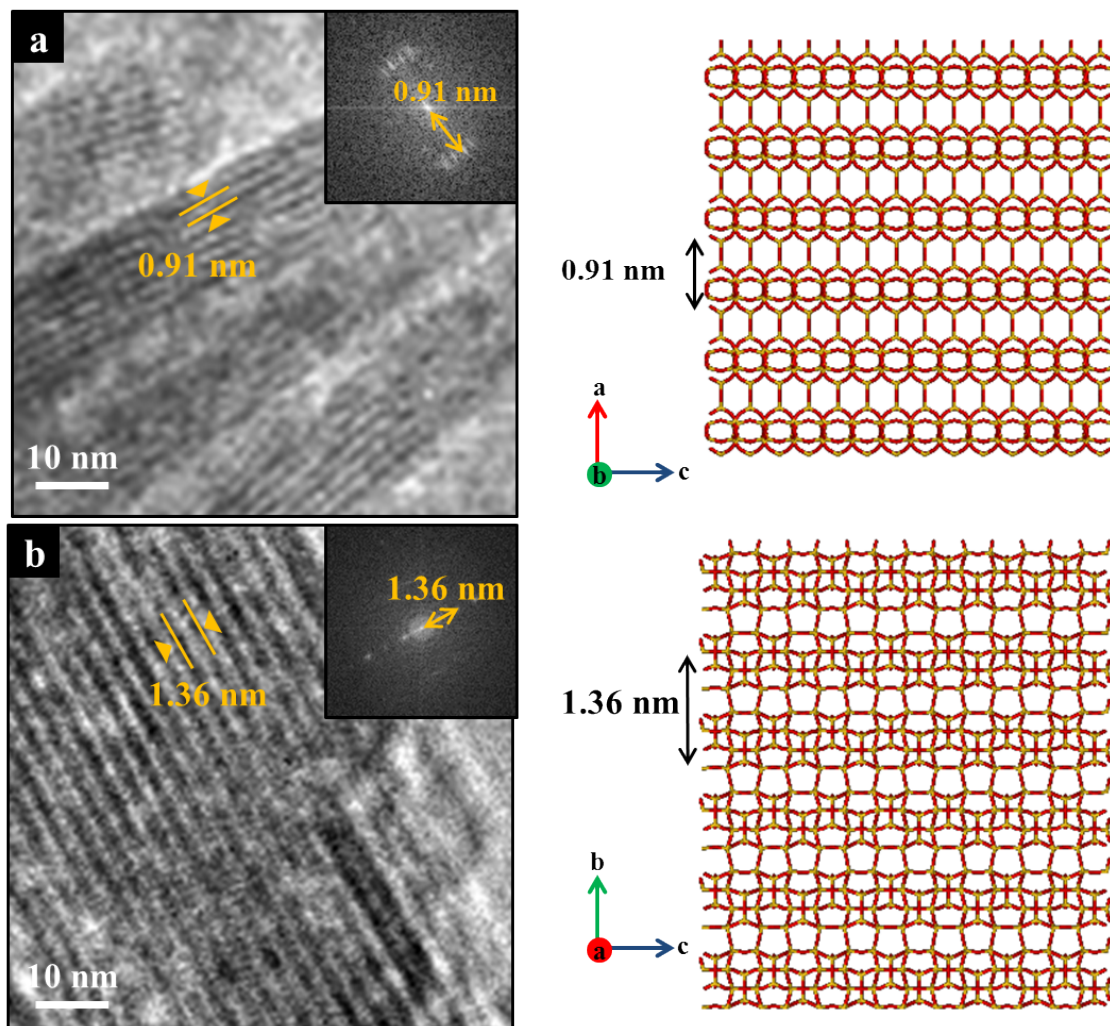

**Fig. S3** (a)  $N_2$  isotherms and (b) their corresponding BJH pore size distributions of *s*-MOR zeolites, which were synthesized with OS-18, OS-16, and OS-12 as mesopore generating agents. The isotherms for OS-16 and OS-18 were vertically offset by 100 and 200  $\text{cm}^3 \text{g}^{-1}$  respectively. The pore size distributions for OS-16 and OS-18 were vertically offset by 0.7 and 1.4  $\text{cm}^3 \text{g}^{-1}$ , respectively.

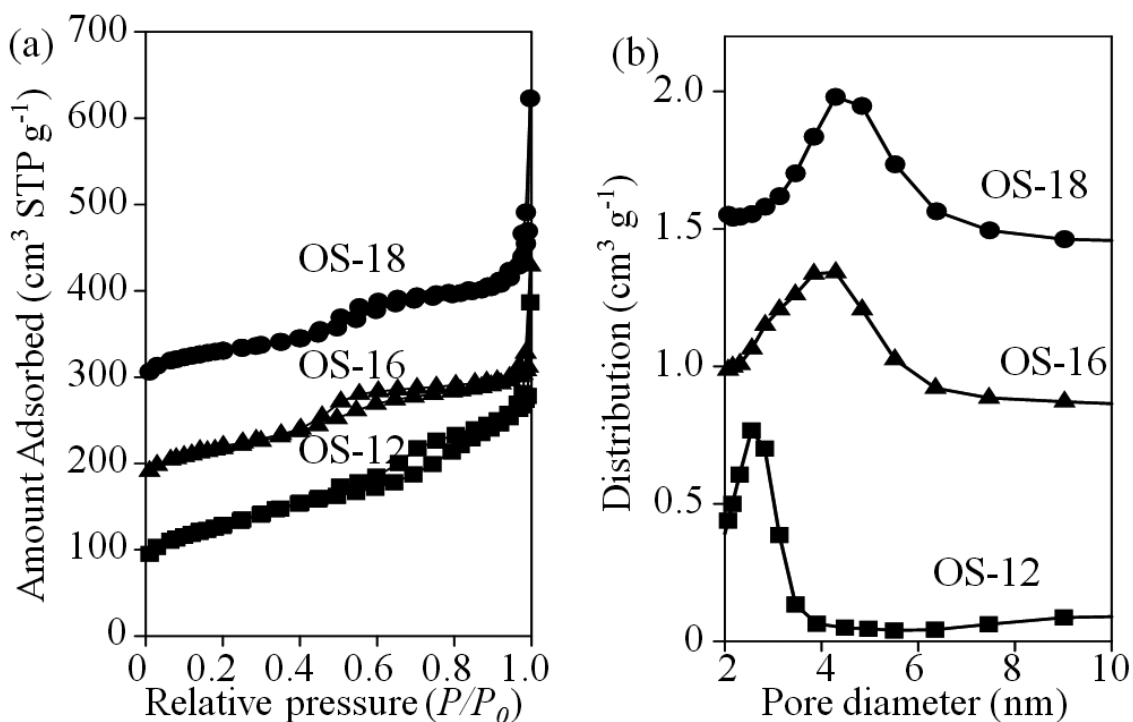

**Fig. S4** XRD patterns of bulk CHA, *us*-CHA, and *s*-CHA.

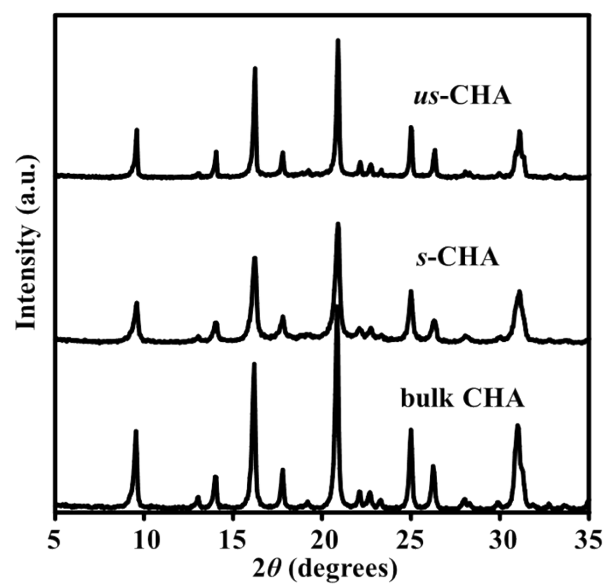

**Fig. S5** Representative SEM and TEM images of *us*-CHA.

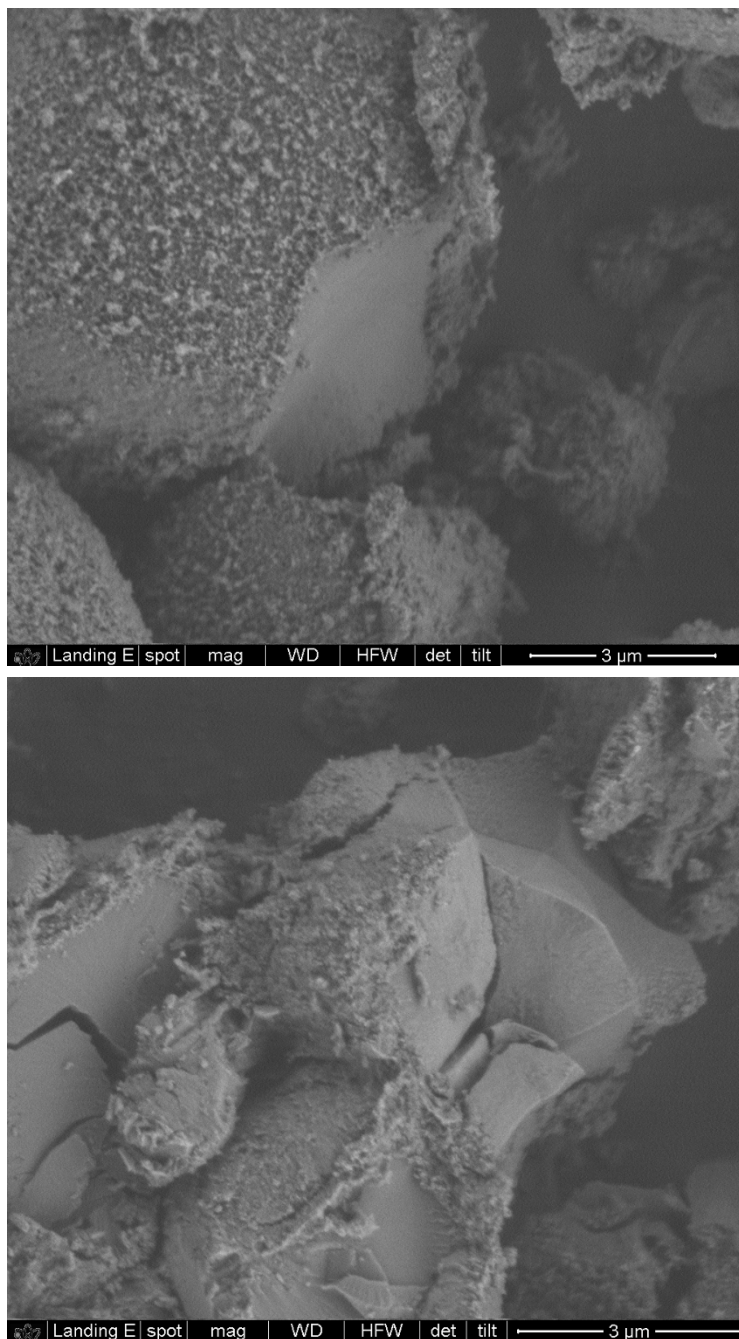

**Fig. S6** Representative SEM and TEM images of *s*-CHA.

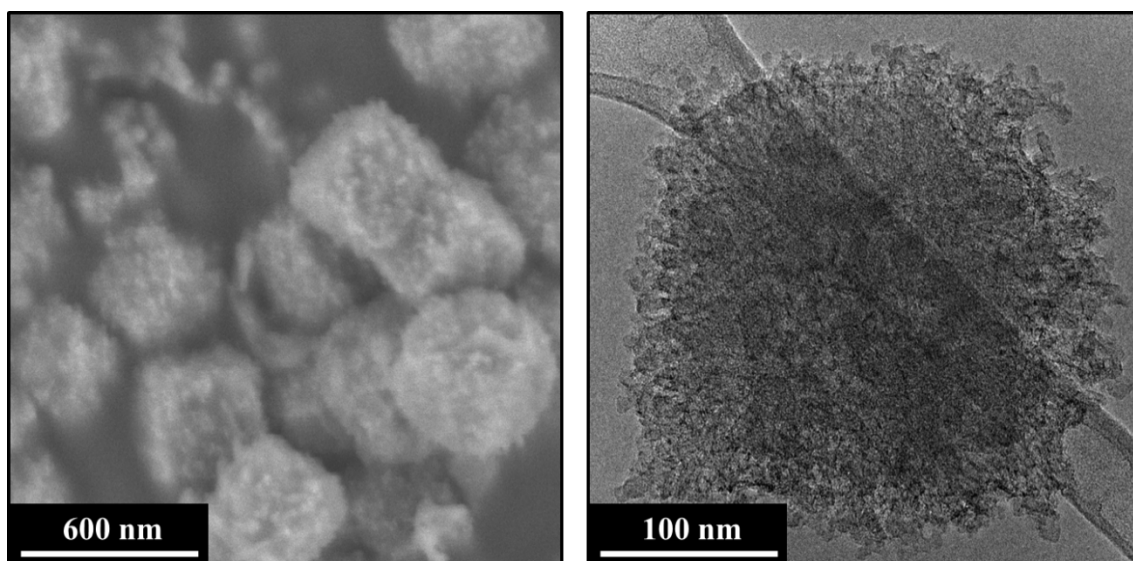

**Fig. S7** Representative SEM and TEM images of *s*-FAU-X

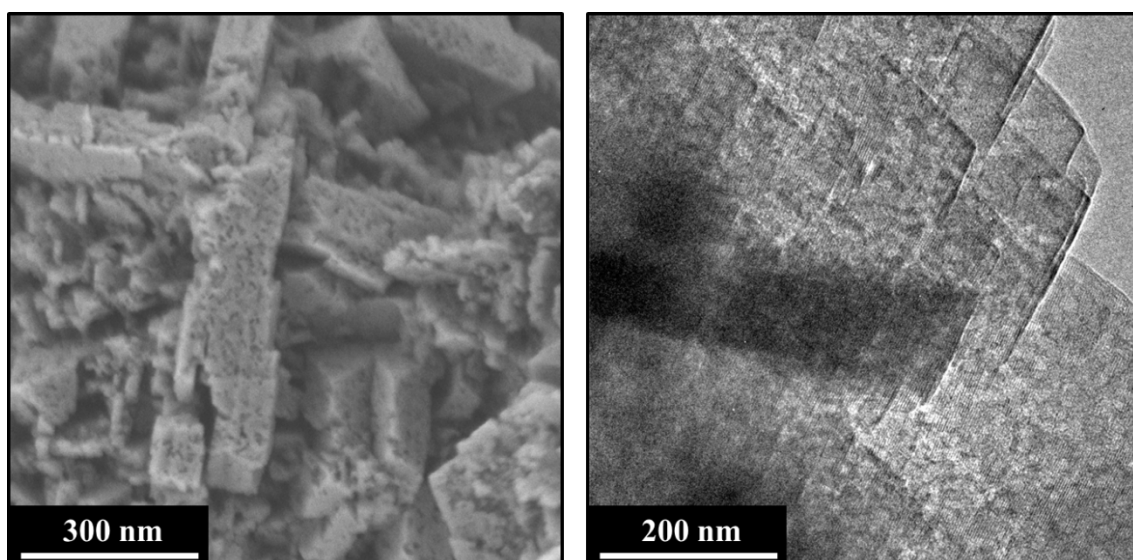

Supplement: c4ta01948b1.pdf [file c4ta01948b1.pdf]
